# Supplementary material
Source: HighWire-hosted journal article supplement (https://adc.bmj.com/content/106/5/484)
Supplement: inline-supplementary-material-1 [file inline-supplementary-material-1.pdf]

## S1: Characteristics and management of infants treated in participating and non-participating sites

|                                                                                     | Non-participating sites | Participating sites |         |
|-------------------------------------------------------------------------------------|-------------------------|---------------------|---------|
|                                                                                     | N=53                    | N=252               |         |
|                                                                                     | n(%)*                   | n(%)*               | p-value |
| <b>Diagnosed in a low volume centre (&lt; national median number of cases/year)</b> |                         |                     | <0.001  |
| No                                                                                  | 0 (0.0%)                | 141 (56.0%)         |         |
| Yes                                                                                 | 53 (100.0%)             | 111 (44.0%)         |         |
| <b>Ethnicity</b>                                                                    |                         |                     | 0.68    |
| White                                                                               | 44 (84.6%)              | 216 (86.7%)         |         |
| BME                                                                                 | 8 (15.4%)               | 33 (13.3%)          |         |
| <b>Gestational age at birth</b>                                                     |                         |                     | 0.10    |
| Term                                                                                | 49 (94.2%)              | 215 (86.0%)         |         |
| Pre-term                                                                            | 3 (5.8%)                | 35 (14.0%)          |         |
| <b>Birthweight</b>                                                                  |                         |                     | 0.060   |
| 2500g or more                                                                       | 49 (96.1%)              | 211 (86.8%)         |         |
| Less than 2500g                                                                     | 2 (3.9%)                | 32 (13.2%)          |         |
| <b>Sex</b>                                                                          |                         |                     | 0.46    |
| Male                                                                                | 38 (73.1%)              | 196 (77.8%)         |         |
| Female                                                                              | 14 (26.9%)              | 56 (22.2%)          |         |
| <b>Family history of HD</b>                                                         |                         |                     | <0.001  |
| No                                                                                  | 41 (78.8%)              | 234 (94.0%)         |         |
| Yes                                                                                 | 11 (21.2%)              | 15 (6.0%)           |         |
| <b>Associated anomaly</b>                                                           |                         |                     | 0.14    |
| Isolated HD                                                                         | 47 (88.7%)              | 184 (73.6%)         |         |
| Down's syndrome                                                                     | 2 (3.8%)                | 26 (10%)            |         |
| Other identified syndrome                                                           | 2 (3.8%)                | 21 (8%)             |         |
| Isolated additional anomaly                                                         | 2 (3.8%)                | 19 (7.6%)           |         |
| <b>Age at presentation</b>                                                          |                         |                     | 0.94    |
| 1-7 days                                                                            | 47 (88.7%)              | 219 (86.9%)         |         |
| 8-28 days                                                                           | 2 (3.8%)                | 11 (4.4%)           |         |
| More than 28 days                                                                   | 4 (7.5%)                | 22 (8.7%)           |         |

\* Percentage of those with complete data

### S1: Characteristics and management of infants treated in participating and non-participating sites - Continued

|                                                      | Non-participating sites | Participating sites |         |
|------------------------------------------------------|-------------------------|---------------------|---------|
|                                                      | N=53                    | N=252               |         |
|                                                      | n(%)*                   | n(%)*               | p-value |
| <b>Age at diagnosis</b>                              |                         |                     | 0.82    |
| <31 days                                             | 47 (88.7%)              | 213 (85.2%)         |         |
| 31-60 days                                           | 2 (3.8%)                | 10 (4.0%)           |         |
| 61-90 days                                           | 3 (5.7%)                | 13 (5.2%)           |         |
| 91-120 days                                          | 1 (1.9%)                | 4 (1.6%)            |         |
| 121-150 days                                         | 0 (0.0%)                | 2 (0.8%)            |         |
| >150 days                                            | 0 (0.0%)                | 8 (3.2%)            |         |
| <b>Transition zone (as defined at surgery)</b>       |                         |                     | 0.35    |
| Rectosigmoid                                         | 31 (67.4%)              | 168 (74.3%)         |         |
| Long segment (proximal to sigmoid colon)             | 11 (23.9%)              | 49 (21.7%)          |         |
| Total colonic aganglionosis                          | 4 (8.7%)                | 9 (4.0%)            |         |
| <b>Stoma created prior to pull-through</b>           |                         |                     | 0.18    |
| No                                                   | 38 (71.7%)              | 156 (61.9%)         |         |
| Yes                                                  | 15 (28.3%)              | 96 (38.1%)          |         |
| <b>Definitive surgery within a year of diagnosis</b> |                         |                     | 0.95    |
| No                                                   | 4 (7.7%)                | 17 (7%)             |         |
| Yes                                                  | 48 (92.3%)              | 225 (93%)           |         |
| <b>Staged definitive procedure</b>                   |                         |                     | 0.14    |
| No                                                   | 38 (77.6%)              | 153 (66.8%)         |         |
| Yes                                                  | 11 (22.4%)              | 76 (33.2%)          |         |
| <b>First approach to the pull-through</b>            |                         |                     | 0.034   |
| Definitive surgery not performed prior to one year   | 5 (9.6%)                | 17 (7%)             |         |
| Open                                                 | 17 (32.7%)              | 87 (36%)            |         |
| Laparoscopic                                         | 9 (17.3%)               | 42 (17.4%)          |         |
| Trans-anal                                           | 3 (5.8%)                | 50 (20.7%)          |         |
| Combined laparoscopic and trans-anal                 | 18 (34.6%)              | 46 (19.0%)          |         |
| <b>Rectal dissection technique</b>                   |                         |                     | 0.007   |
| Submucosal (Soave)                                   | 29 (60.4%)              | 119 (52%)           |         |
| Peri-rectal (Swenson)                                | 9 (18.8%)               | 17 (7.4%)           |         |
| Posterior (Duhamel)                                  | 10 (20.8%)              | 93 (40.6%)          |         |
|                                                      | <b>Median (IQR)</b>     | <b>Median (IQR)</b> |         |
| <b>Weight at stoma formation</b>                     |                         |                     | 0.23    |
| Grams                                                | 3800 (3340, 4200)       | 3500 (3000, 4000)   |         |
| <b>Weight at definitive surgery</b>                  |                         |                     | 0.052   |
| Kilograms                                            | 6.12 (5.2, 6.92)        | 5.43 (4.21, 6.55)   |         |

\* Percentage of those with complete data

## S2: One year outcomes for infants who underwent definitive surgery in participating and non-participating sites

|                                                                        | Non-participating site | Participating site |         |
|------------------------------------------------------------------------|------------------------|--------------------|---------|
|                                                                        | N=36                   | N=204              |         |
|                                                                        | n(%)*                  | n(%)*              | p-value |
| <b>Revision surgery within a year of diagnosis</b>                     |                        |                    | 0.42    |
| No                                                                     | 30 (100.0%)            | 187 (97.9%)        |         |
| Yes                                                                    | 0 (0.0%)               | 4 (2.1%)           |         |
| <b>Post pull-through stoma within a year of diagnosis</b>              |                        |                    | 0.11    |
| No                                                                     | 25 (80.6%)             | 160 (90.4%)        |         |
| Yes                                                                    | 6 (19.4%)              | 17 (9.6%)          |         |
| <b>Post-operative HAE suspected</b>                                    |                        |                    | 0.70    |
| No                                                                     | 25 (71.4%)             | 137 (68.2%)        |         |
| Yes                                                                    | 10 (28.6%)             | 64 (31.8%)         |         |
| <b>One or more unplanned reoperations within a year of diagnosis</b>   |                        |                    | 0.72    |
| No                                                                     | 31 (88.6%)             | 165 (85.9%)        |         |
| Yes                                                                    | 4 (11.4%)              | 27 (14.1%)         |         |
| <b>Total number of unplanned operations within a year of diagnosis</b> |                        |                    | 0.81    |
| None                                                                   | 31 (88.6%)             | 165 (85.9%)        |         |
| One                                                                    | 3 (8.6%)               | 15 (7.8%)          |         |
| Two                                                                    | 1 (2.9%)               | 8 (4.2%)           |         |
| Three                                                                  | 0 (0.0%)               | 4 (2.1%)           |         |

\*Percentage of those with complete data

### S3: Characteristics and management of infants treated in participating sites with and without five to eight year data

|                                                       | No data returned | Data returned |         |
|-------------------------------------------------------|------------------|---------------|---------|
|                                                       | N=13             | N=239         |         |
|                                                       | n(%)*            | n(%)*         | p-value |
| <b>Diagnosed in a low volume (&lt; median) centre</b> |                  |               | 0.46    |
| No                                                    | 6 (46.2%)        | 135 (56.5%)   |         |
| Yes                                                   | 7 (53.8%)        | 104 (43.5%)   |         |
| <b>Ethnicity</b>                                      |                  |               | 0.28    |
| White                                                 | 10 (76.9%)       | 206 (87.3%)   |         |
| BME                                                   | 3 (23.1%)        | 30 (12.7%)    |         |
| <b>Gestational age at birth</b>                       |                  |               | 0.26    |
| Term                                                  | 9 (75.0%)        | 206 (86.6%)   |         |
| Pre-term                                              | 3 (25.0%)        | 32 (13.4%)    |         |
| <b>Birthweight</b>                                    |                  |               | 0.21    |
| 2500g or more                                         | 9 (75.0%)        | 202 (87.4%)   |         |
| Less than 2500g                                       | 3 (25.0%)        | 29 (12.6%)    |         |
| <b>Sex</b>                                            |                  |               | 0.54    |
| Male                                                  | 11 (84.6%)       | 185 (77.4%)   |         |
| Female                                                | 2 (15.4%)        | 54 (22.6%)    |         |
| <b>Family history of HD</b>                           |                  |               | 0.35    |
| No                                                    | 13 (100.0%)      | 221 (93.6%)   |         |
| Yes                                                   | 0 (0.0%)         | 15 (6.4%)     |         |
| <b>Associated anomaly</b>                             |                  |               | 0.39    |
| Isolated HD                                           | 7 (58.3%)        | 177 (74.4%)   |         |
| Down's Syndrome                                       | 3 (23%)          | 23 (10%)      |         |
| Other identified syndrome                             | 1 (8%)           | 20 (8%)       |         |
| Isolated additional anomaly                           | 1 (8.3%)         | 18 (7.6%)     |         |
| <b>Age at presentation (days)</b>                     |                  |               | 0.55    |
| 1-7 days                                              | 10 (76.9%)       | 209 (87.4%)   |         |
| 8-28 days                                             | 1 (7.7%)         | 10 (4.2%)     |         |
| More than 28 days                                     | 2 (15.4%)        | 20 (8.4%)     |         |
| <b>Age at diagnosis</b>                               |                  |               | 0.022   |
| <31 days                                              | 9 (69.2%)        | 204 (86.1%)   |         |
| 31-60 days                                            | 0 (0.0%)         | 10 (4.2%)     |         |
| 61-90 days                                            | 3 (23.1%)        | 10 (4.2%)     |         |
| 91-120 days                                           | 1 (7.7%)         | 3 (1.3%)      |         |
| 121-150 days                                          | 0 (0.0%)         | 2 (0.8%)      |         |
| >150 days                                             | 0 (0.0%)         | 8 (3.4%)      |         |
| <b>Transition zone (as defined at surgery)</b>        |                  |               | 0.75    |
| Rectosigmoid                                          | 9 (75.0%)        | 159 (74.3%)   |         |
| Long segment (proximal to sigmoid colon)              | 3 (25.0%)        | 46 (21.5%)    |         |
| Total colonic aganglionosis                           | 0 (0.0%)         | 9 (4.2%)      |         |

\* Percentage of those with complete data

BME – Black or other minority ethnicity

### S3: Characteristics and management of infants treated in participating sites with and without five to eight year data - Continued

|                                                                                                           | No data returned<br>N=13 | Data returned<br>N=239 |         |
|-----------------------------------------------------------------------------------------------------------|--------------------------|------------------------|---------|
|                                                                                                           | n(%)*                    | n(%)*                  | p-value |
| <b>Stoma created prior to pull-through</b>                                                                |                          |                        | 0.54    |
| No                                                                                                        | 7 (53.8%)                | 149 (62.3%)            |         |
| Yes                                                                                                       | 6 (46.2%)                | 90 (37.7%)             |         |
| <b>Definitive surgery (including permanent stoma) confirmed as occurring within one year of diagnosis</b> |                          |                        | 0.31    |
| No                                                                                                        | 0 (0.0%)                 | 17 (7.4%)              |         |
| Yes                                                                                                       | 12 (100.0%)              | 213 (92.6%)            |         |
| <b>Staged definitive procedure</b>                                                                        |                          |                        | 0.52    |
| No                                                                                                        | 7 (58.3%)                | 146 (67.3%)            |         |
| Yes                                                                                                       | 5 (41.7%)                | 71 (32.7%)             |         |
| <b>First approach to the pull-through</b>                                                                 |                          |                        | 0.56    |
| Pull-through procedure not performed within one year of diagnosis                                         | 0 (0.0%)                 | 17 (7.4%)              |         |
| Open                                                                                                      | 6 (50.0%)                | 81 (35.2%)             |         |
| Laparoscopic                                                                                              | 3 (25.0%)                | 39 (17.0%)             |         |
| Trans-anal                                                                                                | 2 (16.7%)                | 48 (20.9%)             |         |
| Combined laparoscopic and trans-anal                                                                      | 1 (8.3%)                 | 45 (19.6%)             |         |
| <b>Rectal dissection technique</b>                                                                        |                          |                        | 0.32    |
| Submucosal (Soave)                                                                                        | 5 (41.7%)                | 114 (52.5%)            |         |
| Peri-rectal (Swenson)                                                                                     | 0 (0.0%)                 | 17 (7.8%)              |         |
| Posterior (Duhamel)                                                                                       | 7 (58.3%)                | 86 (39.6%)             |         |
|                                                                                                           | <b>Median (IQR)</b>      | <b>Median (IQR)</b>    |         |
| <b>Weight at stoma formation</b>                                                                          |                          |                        | 0.21    |
| Grams                                                                                                     | 4100 (3500, 5000)        | 3475 (3000, 4000)      |         |
| <b>Weight at definitive surgery</b>                                                                       |                          |                        | 0.99    |
| Kilograms                                                                                                 | 5.5 (4.5, 7.32)          | 5.4 (4.2, 6.55)        |         |

\*Percentage of those with complete data

#### S4: Outcomes at one year post diagnosis for children with and without five to eight year data returned

Based upon those children who had undergone definitive surgery in a participating hospital, and for whom one-year outcomes data had been returned.

|                                                                     | No data returned  | Data returned      |         |
|---------------------------------------------------------------------|-------------------|--------------------|---------|
|                                                                     | N=11 <sup>#</sup> | N=193 <sup>#</sup> |         |
|                                                                     | n(%) <sup>*</sup> | n(%) <sup>*</sup>  | p-value |
| <b>Revision surgery within a year of diagnosis</b>                  |                   |                    | 0.63    |
| No                                                                  | 10 (100.0%)       | 177 (97.8%)        |         |
| Yes                                                                 | 0 (0.0%)          | 4 (2.2%)           |         |
| <b>Post pull-through stoma within a year of diagnosis</b>           |                   |                    | 0.78    |
| No                                                                  | 7 (87.5%)         | 153 (90.5%)        |         |
| Yes                                                                 | 1 (12.5%)         | 16 (9.5%)          |         |
| <b>Post-operative HAE suspected</b>                                 |                   |                    | 0.32    |
| No                                                                  | 9 (81.8%)         | 128 (67.4%)        |         |
| Yes                                                                 | 2 (18.2%)         | 62 (32.6%)         |         |
| <b>One or more unplanned reoperation within a year of diagnosis</b> |                   |                    | 0.65    |
| No                                                                  | 9 (81.8%)         | 156 (86.2%)        |         |
| Yes                                                                 | 2 (18.2%)         | 25 (13.8%)         |         |

<sup>#</sup> Those children who had undergone definitive surgery prior to one year of age, and for whom one-year outcomes data were returned

<sup>\*</sup> Percentage of those with complete data

## S5: Characteristics and management of infants with and without parental follow-up data

|                                                             | No Parental Data | Parental Data | p-value |
|-------------------------------------------------------------|------------------|---------------|---------|
|                                                             | N=157<br>n(%)*   | N=83<br>n(%)* |         |
| Low volume centre (<median number of cases/year)            |                  |               | 0.006   |
| No                                                          | 97 (61.8%)       | 36 (43.4%)    |         |
| Yes                                                         | 60 (38.2%)       | 47 (56.6%)    |         |
| Ethnicity                                                   |                  |               | 0.22    |
| White                                                       | 131 (84.5%)      | 74 (90.2%)    |         |
| Non-white                                                   | 24 (15.5%)       | 8 (9.8%)      |         |
| Gestational age at birth                                    |                  |               | 0.89    |
| Term                                                        | 136 (87.2%)      | 72 (87.8%)    |         |
| Pre-term                                                    | 20 (12.8%)       | 10 (12.2%)    |         |
| Birthweight                                                 |                  |               | 0.77    |
| 2500g or more                                               | 132 (87.4%)      | 71 (88.8%)    |         |
| Less than 2500g                                             | 19 (12.6%)       | 9 (11.2%)     |         |
| Sex                                                         |                  |               | 0.65    |
| Male                                                        | 125 (79.6%)      | 64 (77.1%)    |         |
| Female                                                      | 32 (20.4%)       | 19 (22.9%)    |         |
| Family history of Hirschsprung's disease                    |                  |               | 0.21    |
| No                                                          | 148 (95.5%)      | 75 (91.5%)    |         |
| Yes                                                         | 7 (4.5%)         | 7 (8.5%)      |         |
| Associated anomaly                                          |                  |               | 0.97    |
| Isolated Hirschsprung's disease                             | 120 (76.9%)      | 62 (75.6%)    |         |
| Syndromic                                                   | 25 (16.0%)       | 14 (17.1%)    |         |
| Isolated additional anomaly                                 | 11 (7.1%)        | 6 (7.3%)      |         |
| Age at presentation (days)                                  |                  |               | 0.23    |
| 1-7 days                                                    | 139 (88.5%)      | 70 (84.3%)    |         |
| 8-28 days                                                   | 4 (2.5%)         | 6 (7.2%)      |         |
| More than 28 days                                           | 14 (8.9%)        | 7 (8.4%)      |         |
| Age at diagnosis                                            |                  |               | 0.86    |
| <31 days                                                    | 131 (84.0%)      | 72 (86.7%)    |         |
| 31-60 days                                                  | 5 (3.2%)         | 4 (4.8%)      |         |
| 61-90 days                                                  | 10 (6.4%)        | 3 (3.6%)      |         |
| 91-120 days                                                 | 3 (1.9%)         | 1 (1.2%)      |         |
| 121-150 days                                                | 1 (0.6%)         | 1 (1.2%)      |         |
| >150 days                                                   | 6 (3.8%)         | 2 (2.4%)      |         |
| Transition zone (as defined at surgery)                     |                  |               | 0.64    |
| Rectosigmoid                                                | 113 (75.8%)      | 52 (70.3%)    |         |
| Long segment (proximal to sigmoid colon)                    | 30 (20.1%)       | 19 (25.7%)    |         |
| Total colonic aganglionosis                                 | 6 (4.0%)         | 3 (4.1%)      |         |
| Stoma created prior to pull-through                         |                  |               | 0.32    |
| No                                                          | 103 (65.6%)      | 49 (59.0%)    |         |
| Yes                                                         | 54 (34.4%)       | 34 (41.0%)    |         |
| Definitive surgery confirmed as occurring prior to one year |                  |               | 0.27    |
| No                                                          | 9 (5.8%)         | 8 (9.6%)      |         |

|                                                        |                   |                    |       |
|--------------------------------------------------------|-------------------|--------------------|-------|
| Yes                                                    | 147 (94.2%)       | 75 (90.4%)         |       |
| Staged definitive procedure                            |                   |                    | 0.66  |
| No                                                     | 103 (67.8%)       | 48 (64.9%)         |       |
| Yes                                                    | 49 (32.2%)        | 26 (35.1%)         |       |
| First attempted approach to the pull-through           |                   |                    | 0.042 |
| Pull-through procedure not performed prior to one year | 9 (5.8%)          | 8 (9.6%)           |       |
| Open                                                   | 57 (36.5%)        | 29 (34.9%)         |       |
| Laparoscopic                                           | 20 (12.8%)        | 21 (25.3%)         |       |
| Trans-anal                                             | 39 (25.0%)        | 11 (13.3%)         |       |
| Combined laparoscopic and trans-anal                   | 31 (19.9%)        | 14 (16.9%)         |       |
| Rectal dissection technique                            |                   |                    | 0.21  |
| Submucosal (Soave)                                     | 81 (53.6%)        | 36 (48.0%)         |       |
| Peri-rectal (Swenson)                                  | 13 (8.6%)         | 3 (4.0%)           |       |
| Posterior (Duhamel)                                    | 57 (37.7%)        | 36 (48.0%)         |       |
| Weight(g) at stoma formation, median (IQR)             | 3622 (3040, 4200) | 3550 (2700, 3800)  | 0.30  |
| Weight at definitive surgery(kg), median (IQR)         | 5.5 (4.48, 6.64)  | 5.15 (4.03, 6.405) | 0.32  |

\*Percentage of those with complete data
